# Supplementary material for: Live Observation of Two Parallel Membrane Degradation Pathways at Axon Terminals
Source: PubMed Central journal article supplement — Curr Biol. Author manuscript; Available in PMC 2018 May 10. (PMC5944365; doi:10.1016/j.cub.2018.02.032), 2018-03-15
Supplement: NIHMS957789-supplement-1.pdf [file NIHMS957789-supplement-1.pdf]

**Current Biology, Volume 28**

**Supplemental Information**

**Live Observation of Two Parallel Membrane**

**Degradation Pathways at Axon Terminals**

**Eugene Jennifer Jin, Ferdi Ridvan Kiral, Mehmet Neset Ozel, Lara Sophie Burchardt, Marc Osterland, Daniel Epstein, Heike Wolfenberger, Steffen Prohaska, and Peter Robin Hiesinger**

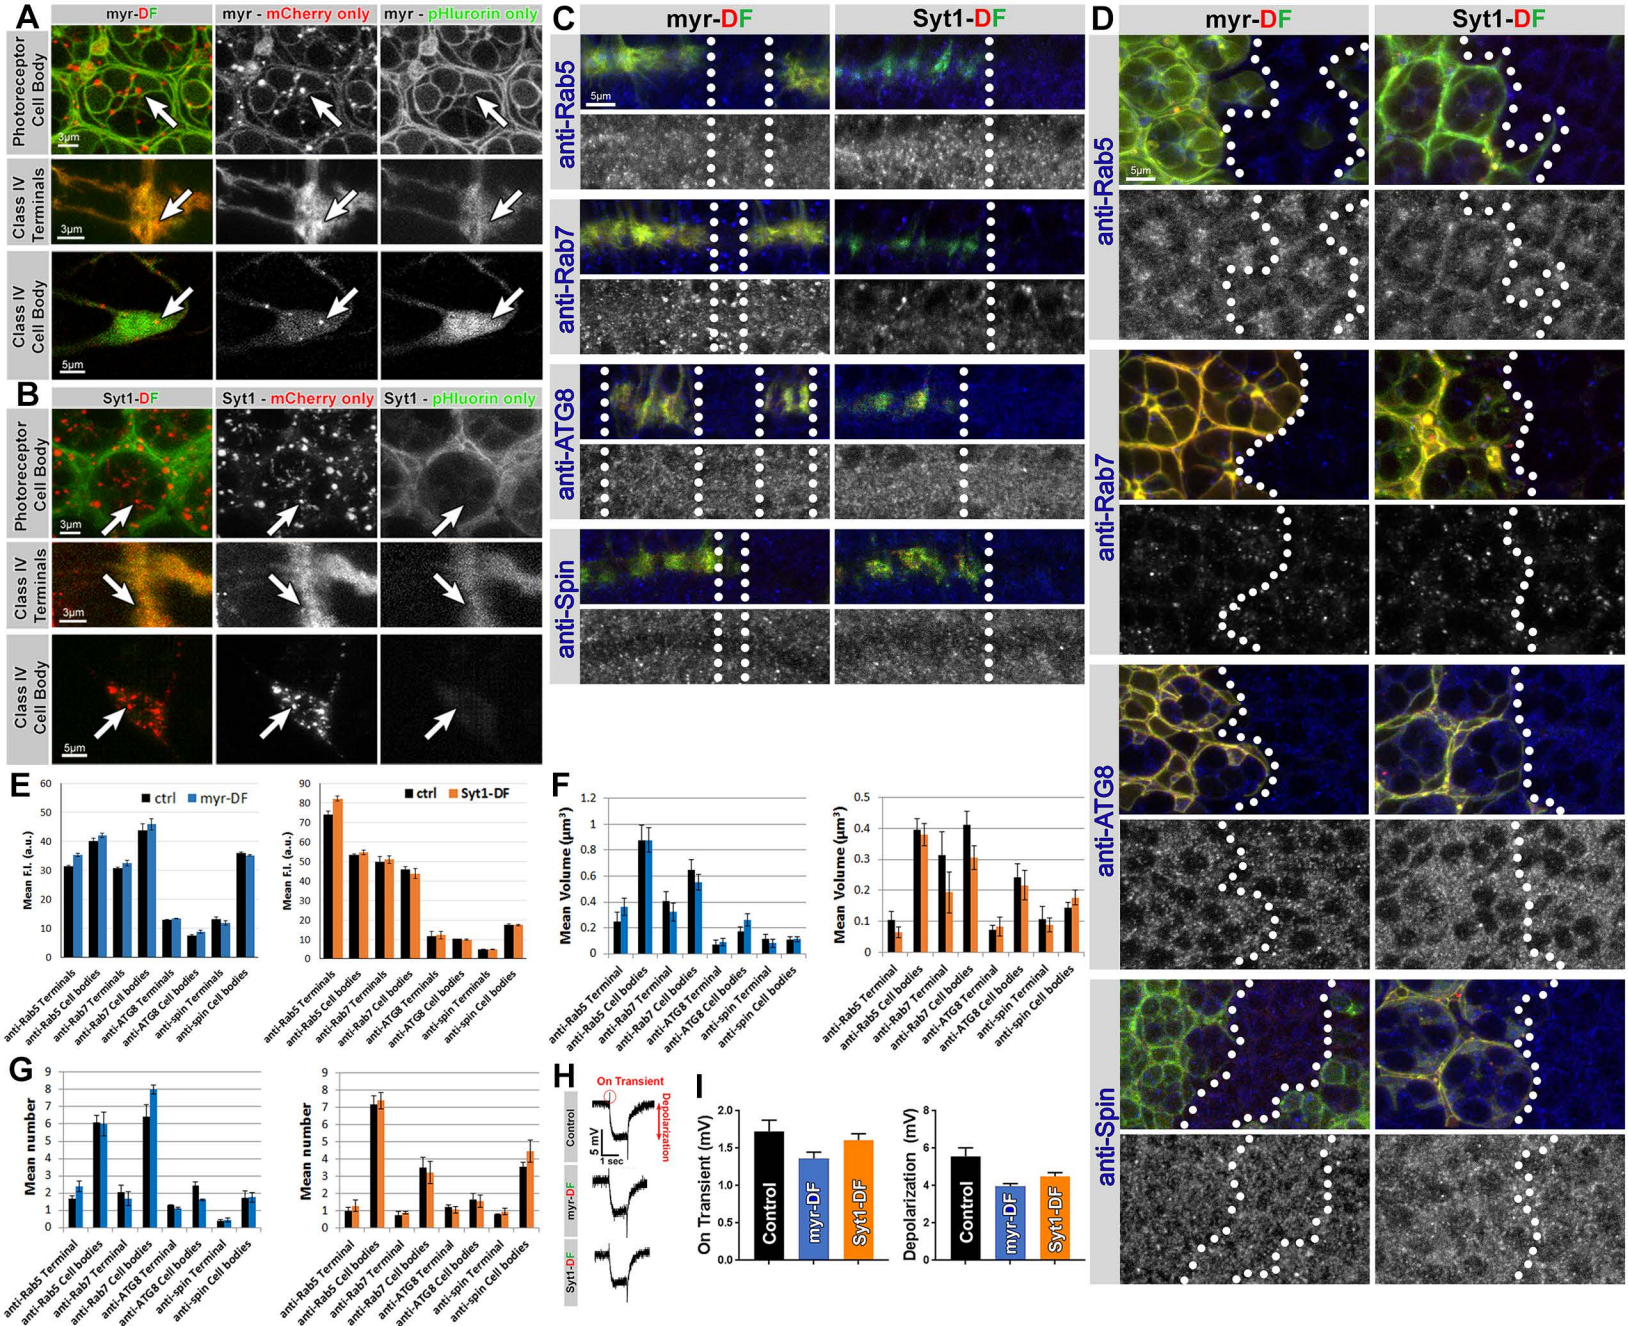

**Figure S1. Myr-DF and Syt1-DF probes mark large acidic compartments in photoreceptor cell bodies, class IV da neuron axon terminals and cell bodies, and expression of neither probe affects endolysosomal and autophagic markers or photoreceptor function. Related to Figure 1.**

(A and B) Live imaging of myr-DF (A) and Syt1-DF (B) reveal the presence of large acidic compartments in photoreceptor cell bodies at P+40%, class IV dendritic arborization neuron axon terminals and cell bodies. Arrows: examples of acidic (red-only live) compartments. (C and D) Comparison of the levels of endolysosomal and autophagic pathways markers (Rab5, early endosome; Rab7, late endosome/multivesicular bodies (MVB); ATG8, autophagosome; Spin, lysosome) in mosaic expression of myr-DF or Syt1-DF at P+40% photoreceptor axon terminals (C) and cell bodies (D). The white dotted lines mark clonal boundaries (with and without probe expression). (E-G) Comparison of mean fluorescence (E), mean volume (F) and mean number (G) of endogenous endolysosomal markers in control (black) and probe-expressing [myr-DF (blue), Syt1-DF (orange)] axon terminals and cell bodies. Mean number per axon terminal was quantified, and mean number per ommatidium was quantified for cell bodies. Mean  $\pm$  SEM, Unpaired t-test, brain n=3 per antibody staining. (H and I) Electroretinogram (ERG) recordings from adult photoreceptors expressing either myr-DF or Syt1-DF. Representative ERG traces (H), and quantifications of on-transient and depolarization amplitudes (I). Mean  $\pm$  SEM, fly n=10 per genotype.

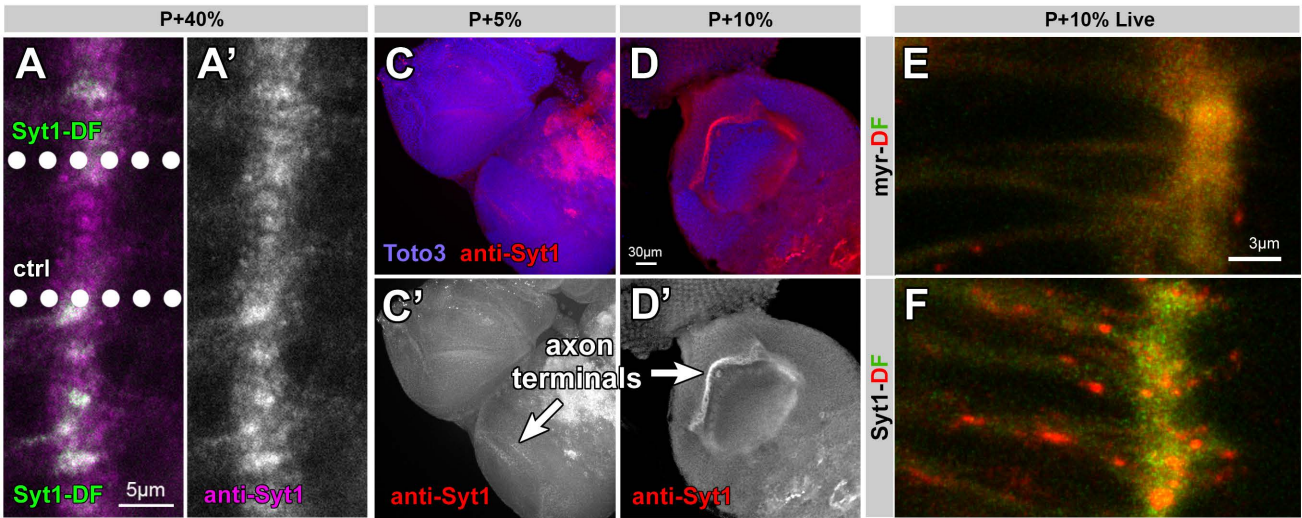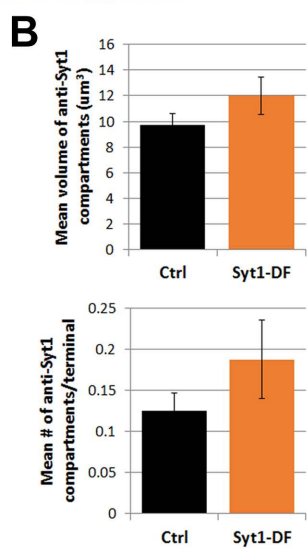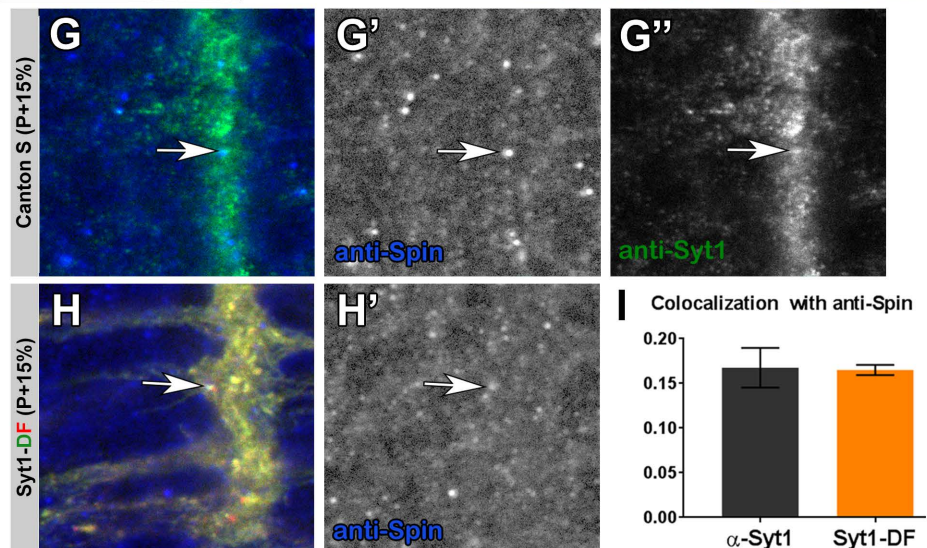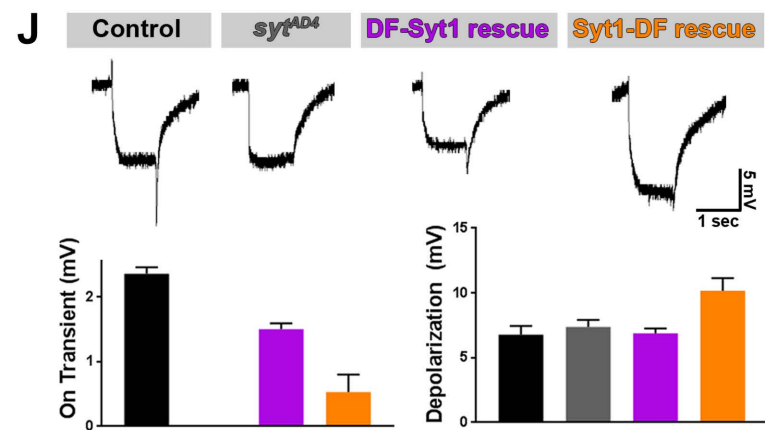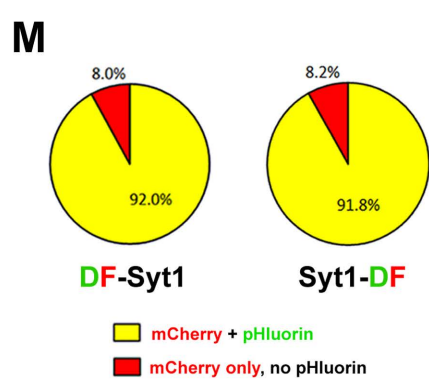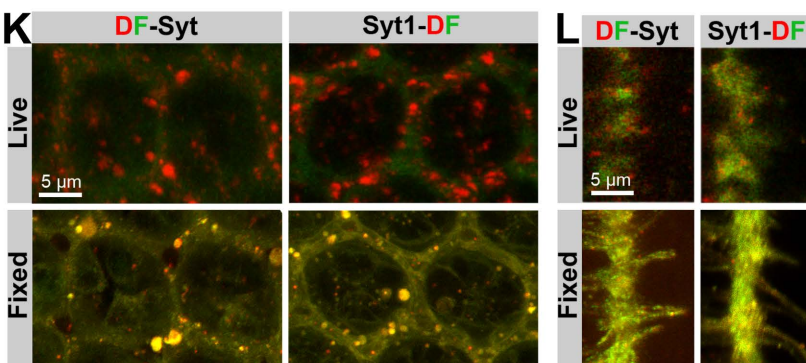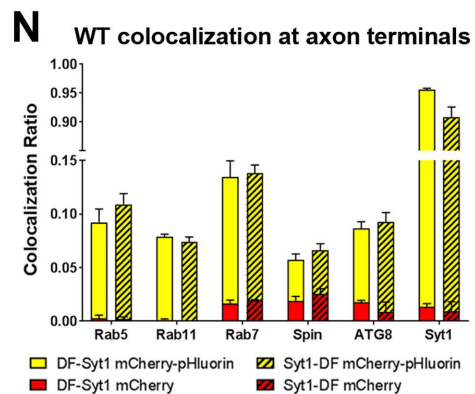

**Figure S2. Syt1-DF is expressed at endogenous levels and sorted for degradation indistinguishably from endogenous Syt1, and cytoplasmically tagged Syt1-DF and lumenally tagged DF-Syt1 are indistinguishably localized and degraded in the endolysosomal pathway. Related to Figure 1.**

(A-B) Antibody labeling with anti-Syt1 in mosaic expression of Syt1-DF in the P+40% photoreceptor axon terminals (A and A') and quantification of mean volume and number of compartments marked by anti-Syt1 (B). Mean  $\pm$  SEM, brain n=3, Unpaired t-test. The white dotted lines mark clonal boundaries (with and without probe expression). (C-D') Endogenous Syt1 is localized to axon terminals of photoreceptors starting at 10% pupal development (P+10%). (E and F) Live imaging of myr-DF and Syt1-DF probes at P+10% photoreceptor axon terminals. Note that Syt1 protein turnover starts as soon as it is localized to photoreceptor terminals. (G-H') Syt1-DF colocalizes with lysosomal marker Spin equally as the endogenous Syt1 at P+15%. Arrows: colocalization of Syt1 compartments with anti-Spin. (I) Quantification of colocalization of endogenous Syt1 or Syt1-DF with anti-Spin at P+15%. Mean  $\pm$  SEM, brain n=3 per experimental condition. (J) Rescue experiment of loss of neurotransmission of sytAD4 null mutant photoreceptors using either C- or N-terminally tagged Syt1 expression (Syt1-DF or DF-Syt1) in 1 day old adult flies. Representative ERG traces, and quantification of on-transient and depolarization amplitudes. Fly n=7 per genotype. (K and L) Live and fixed imaging of Syt1-DF and DF-Syt1 in cell bodies (K) and axon terminals (L) of P+40% photoreceptors. (M) Ratio of mCherry-only Syt1-DF and DF-Syt1 compartments at axon terminals after fixation. Brain n=15 per probe. (N) Colocalization of DF-Syt1 (non-striped) and Syt1-DF (striped) compartments with markers of endolysosomal system, autophagy and Syt1 antibody. Shown are ratios for 'yellow-fixed' and 'red-fixed' terminal hub compartments that colocalize with a given antibody divided by the total number of compartments. The 'yellow-fixed' and 'red-fixed' bars are stacked in the bar chart. Mean  $\pm$  SEM, brain n=3 per antibody staining.

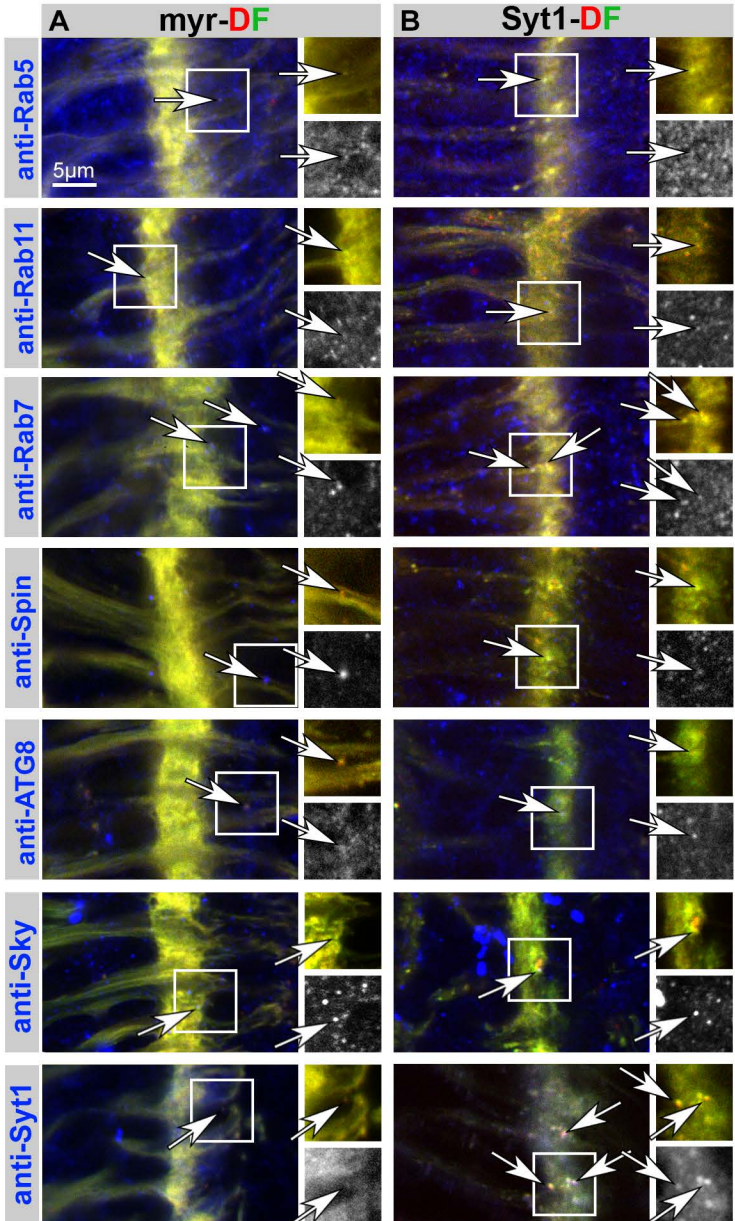

**Figure S3. Colocalization of myr-DF or Syt1-DF probes with endolysosomal and autophagosomal markers at axon terminals. Related to Figure 2.**

Representative images for colocalization of myr-DF (A) or Syt1-DF (B) at axon terminals with Rab5, Rab11, Rab7, Spinster (Spin), Atg8, Skywalker (Sky) and Synaptotagmin 1 (Syt1). Arrows: examples of colocalization. Single channels are antibody stainings.

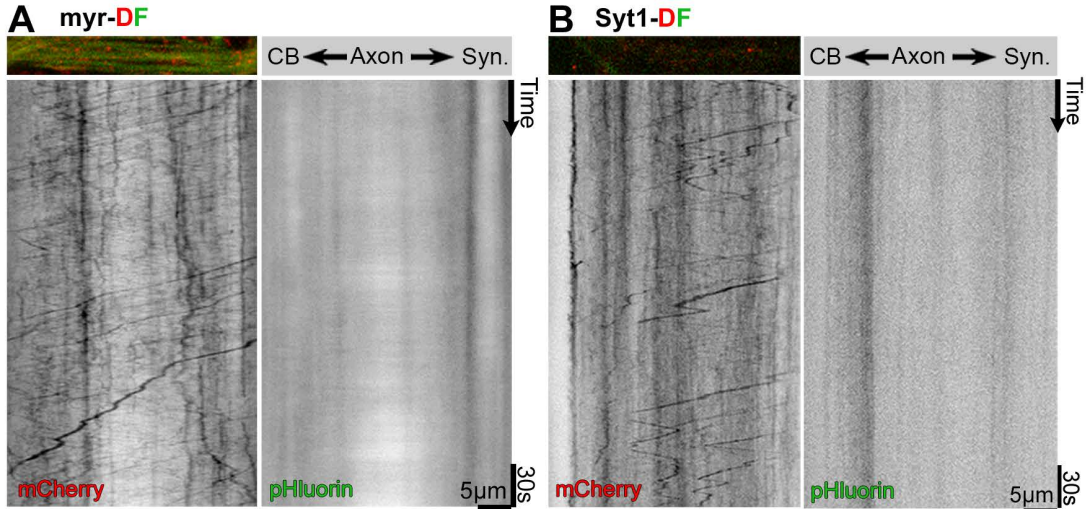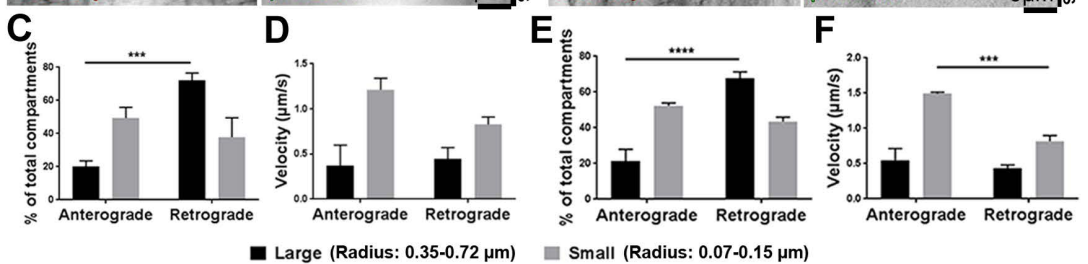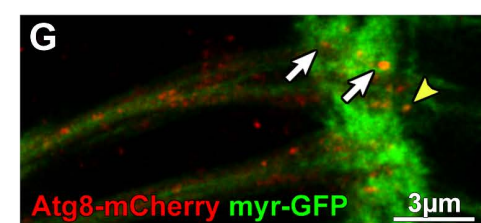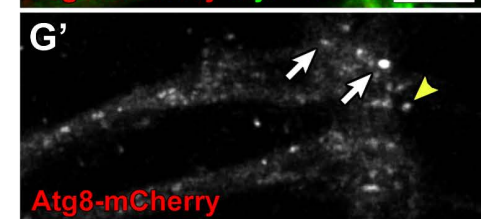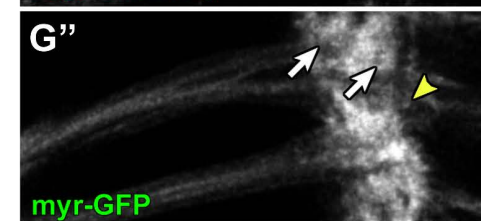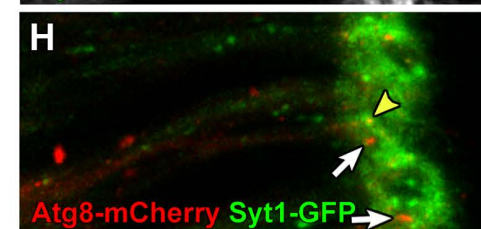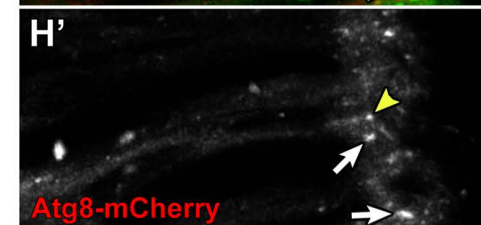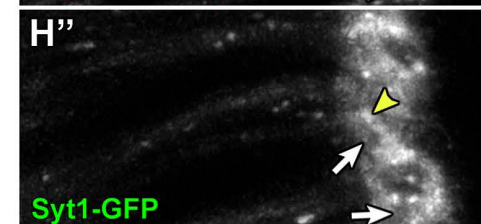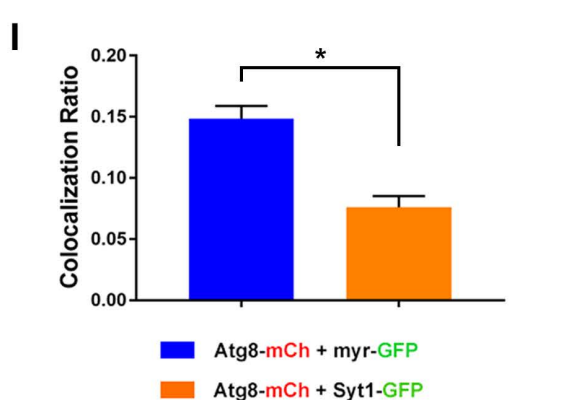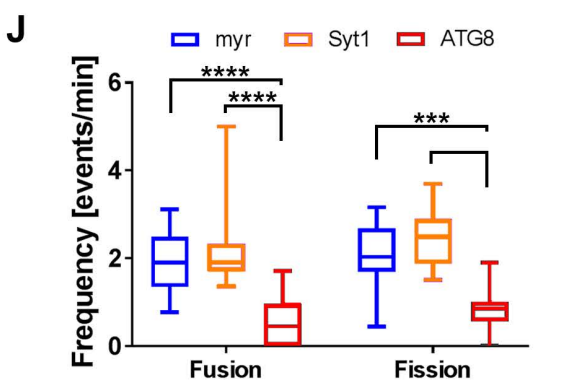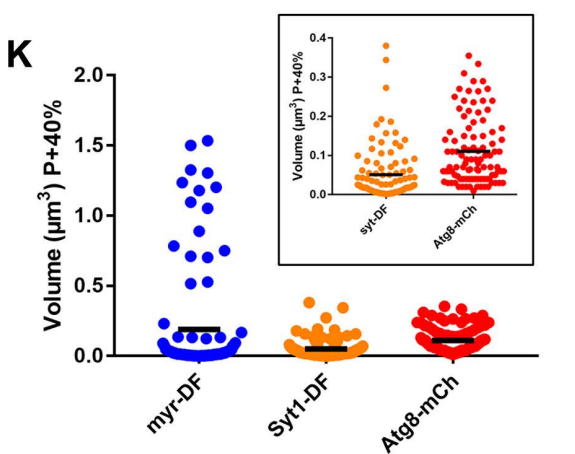

**Figure S4. Axonal transport dynamics of acidified axonal trafficking vesicles, and characteristics of autophagosomes compared to hub compartments. Related to Figure 3.**

(A and B) Kymographs showing axonal transport of myr-DF (A) and Syt1-DF (B) positive compartments. (C and E) Net direction of large or small compartments positive for myr-DF (C) and Syt1-DF (E). Quantification for stationary compartments is not shown. Mean  $\pm$  SEM, \*\*\*  $p < 0.001$ , \*\*\*\*  $p < 0.0001$ , Unpaired t-test, brain  $n = 3$  per probe. (D and F) Mean velocity of retrogradely or anterogradely trafficked compartments for myr-DF (D) and Syt1-DF (F). Mean  $\pm$  SEM, \*\*\*  $p < 0.001$ , \*\*\*\*  $p < 0.0001$ , Unpaired t-test, brain  $n = 3$  per probe. (G-H'') Live imaging of co-expression of Atg8-mCherry and myr-GFP (G-G'') or Syt1-GFP (H-H'') at P+40% photoreceptor terminals and axons. White arrows: autophagosomes that do not co-localize with myr-GFP or Syt1-GFP positive compartments. Yellow arrowhead: autophagosomes that co-localize with myr-GFP or Syt1-GFP positive compartments. Stacks have been checked in 4D data for co-migration of autophagosomes and Syt1-GFP or myr-GFP positive compartments. (I) Quantification of colocalization ratio between Atg8-mCherry and myr-GFP or Syt1-GFP, Respectively. Mean  $\pm$  SEM, \*  $p < 0.05$ , Unpaired t-test, brain  $n = 3$  per co-expression. (J) Fusion and fission frequencies of Atg8-mCherry positive autophagosomes compared to myr-DF and Syt1-DF positive acidified compartments. Box and whiskers plot, showing 5-95 percentiles, hub  $n = 12$  to 15 per probe, \*\*\*  $p < 0.001$ , \*\*\*\*  $p < 0.0001$ , Unpaired t-test. (K) Volumes of Atg8-mCherry compartments at axon terminals at P+40%, compared with acidified myr-DF and Syt1-DF from Figure 4D. Hub  $n = 100$  per probe, black lines indicate mean values. Inset compares volumes of Syt1-DF and Atg8-mCherry compartments.

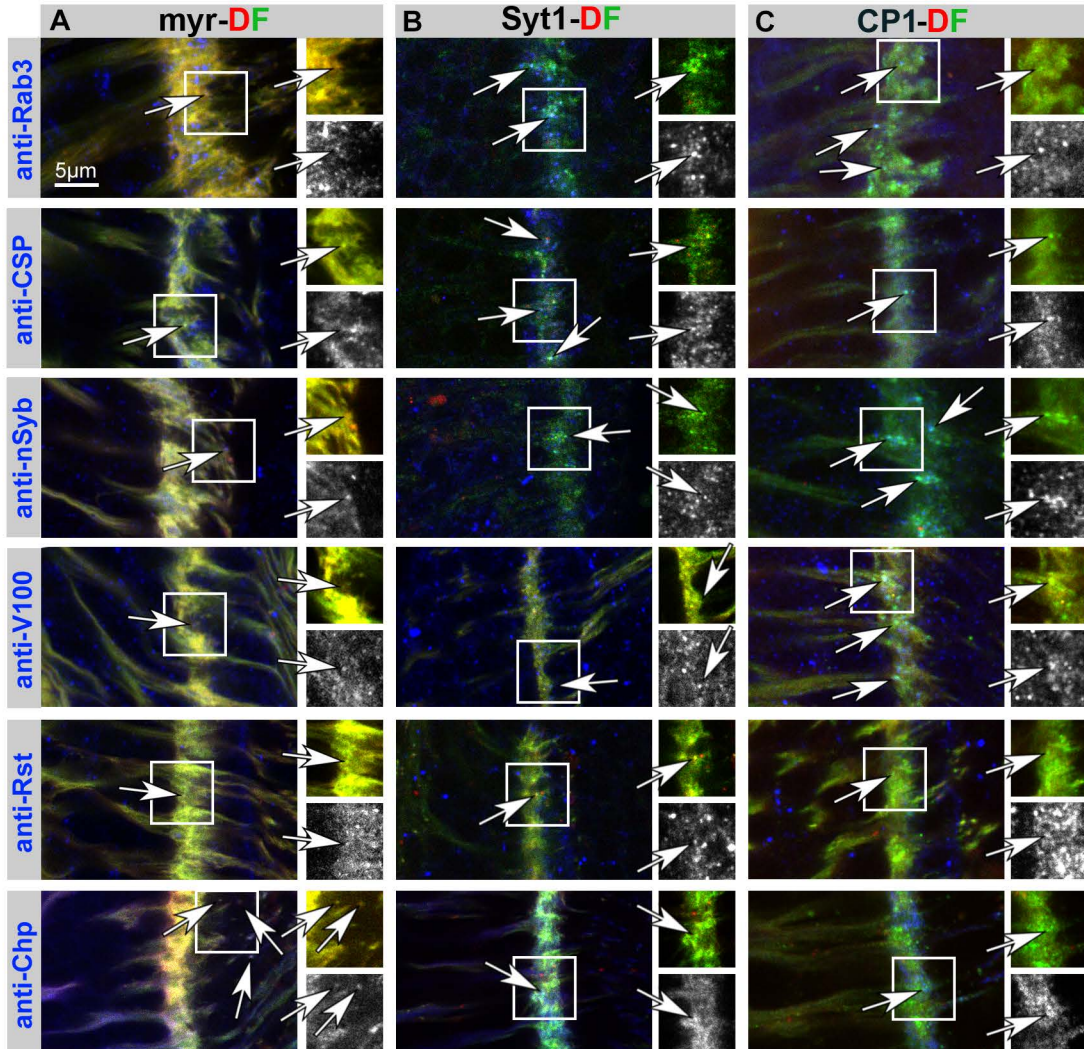

**Figure S5. Colocalization of hub compartments at axon terminals with synaptic vesicle proteins and plasma membrane proteins. Related to Figure 4.**

Representative images for colocalization of myr-DF (A), Syt1-DF (B), and CP1-DF (C) positive compartments with SV markers (Rab3, Cystein String Proteins (CSP)), SV and endolysosomal markers (neuronal Synaptobrevin (n-Syb) and vesicular ATPase component V100), and two photoreceptor plasma membrane receptors (Chaoptin (Chp) and Roughest (Rst)). Arrows: examples of colocalization. Single channels are antibody stainings.



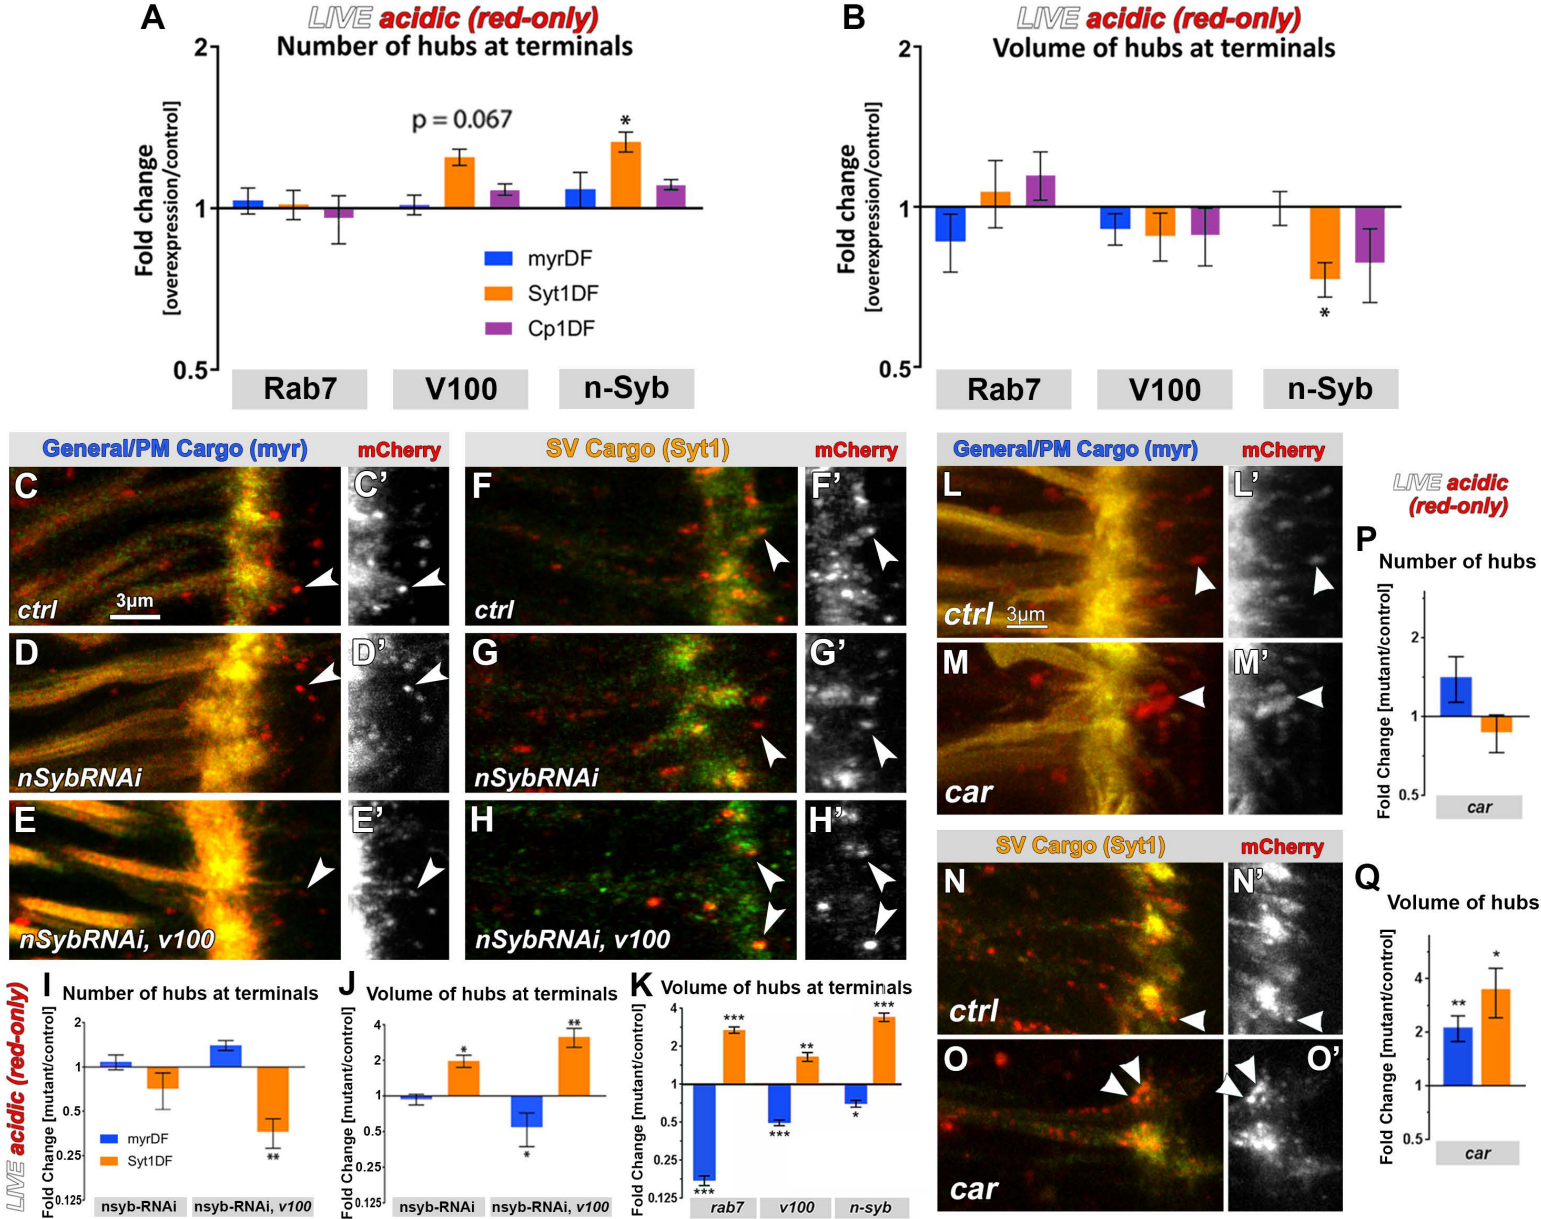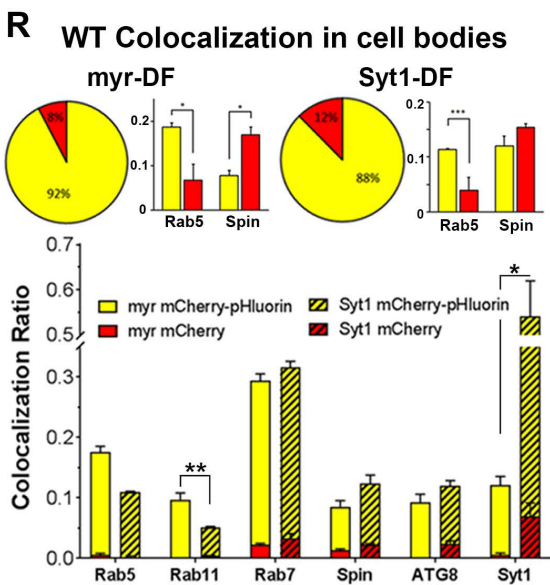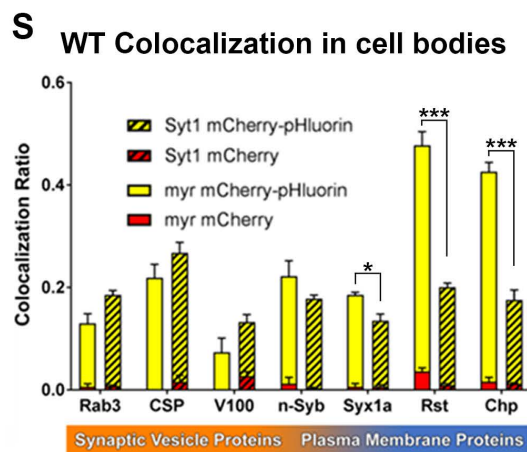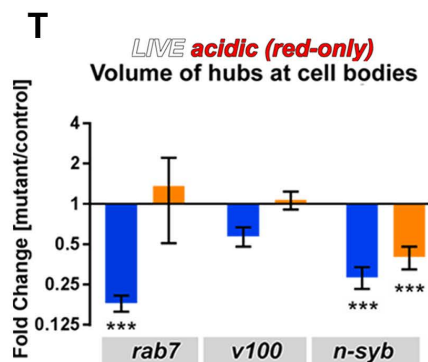

**Figure S6. Live and subcellular characterization of myr-DF and Syt1-DF marked compartments at axon terminals and cell bodies. Related to Figure 5.**

(A and B) Relative number (A) and volume (B) of degradative compartments in Rab7, V100 or n-Syb overexpressing axon terminals. Mean  $\pm$  SEM, \*  $p < 0.05$ , Unpaired t-test, brain  $n = 3$  per experimental condition. (C-H') Live imaging of myr-DF and Syt1-DF in n-Syb knockdown (n-Syb RNAi) or n-Syb knockdown in v100 mutant background at P+40% photoreceptor axon terminals. Arrowheads: examples of acidic (red-only live) compartments at axon terminals. (I and J) Relative number (I) and volume (J) of degradative compartments from live imaging data shown in A-F'. Mean  $\pm$  SEM, \*  $p < 0.05$ , \*\*  $p < 0.01$ , Unpaired t-test, brain  $n = 3$  per experimental condition. (K) Relative volume of acidic compartments in mutants from live imaging data at axon terminals (Figure 5A-5H'). Mean  $\pm$  SEM, \*  $p < 0.05$ , \*\*  $p < 0.01$ , \*\*\*  $p < 0.001$ , Kolmogorov-Smirnov test, hub  $n = 240$  to 1314, brain  $n = 3$  per experimental condition. (L-O') Live imaging of myr-DF and Syt1-DF in car mutant background at P+40% photoreceptor axon terminals. Arrowheads: examples of acidic (red-only live) compartments at axon terminals. (P and Q) Relative number (P) and volume (Q) of acidic compartments in car mutant live imaging data. Mean  $\pm$  SEM, \*  $p < 0.05$ , \*\*  $p < 0.01$ , Unpaired t-test, brain  $n = 3$  per experimental condition. (R) Wildtype colocalization of myr-DF and Syt1-DF compartments in cell bodies. Pie charts show ratios of 'red-fixed' vs 'yellow-fixed' compartments in cell bodies. Bar charts show colocalization ratios of 'yellow-fixed' and 'red-fixed' compartments separately with early endosomal marker Rab5 and lysosomal marker Spin. Bar chart on the bottom shows wildtype colocalization of myr-DF (non-striped) and Syt1-DF (striped) compartments with markers of endolysosomal system, autophagy and Syt1 antibody in cell bodies. Shown are ratios for 'yellow-fixed' and 'red-fixed' compartments that colocalize with a given antibody divided by the total number of compartments. The 'yellow-fixed' and 'red-fixed' bars are stacked in the bar chart. Mean  $\pm$  SEM, Unpaired t-test, \*  $p < 0.05$ , \*\*  $p < 0.01$ , \*\*\*  $p < 0.01$ , brain  $n = 3$  to 5. (S) Wildtype colocalization of myr-DF (non-striped) and Syt1-DF (striped) compartments with markers of SV proteins and plasma membrane proteins in cell bodies. Shown are ratios for 'yellow-fixed' and 'red-fixed' compartments that colocalize with a given antibody divided by the total number of compartments. The 'yellow-fixed' and 'red-fixed' bars are stacked in the bar chart. Mean  $\pm$  SEM, Unpaired t-test, \*  $p < 0.05$ , \*\*\*  $p < 0.001$ , brain  $n = 3$  per antibody staining. (T) Relative volume of acidic compartments in mutants from live imaging data in cell bodies. Mean  $\pm$  SEM, \*\*\*  $p < 0.001$ , Kolmogorov-Smirnov test, hub  $n = 240$  to 1314, brain  $n = 3$  per experimental condition.

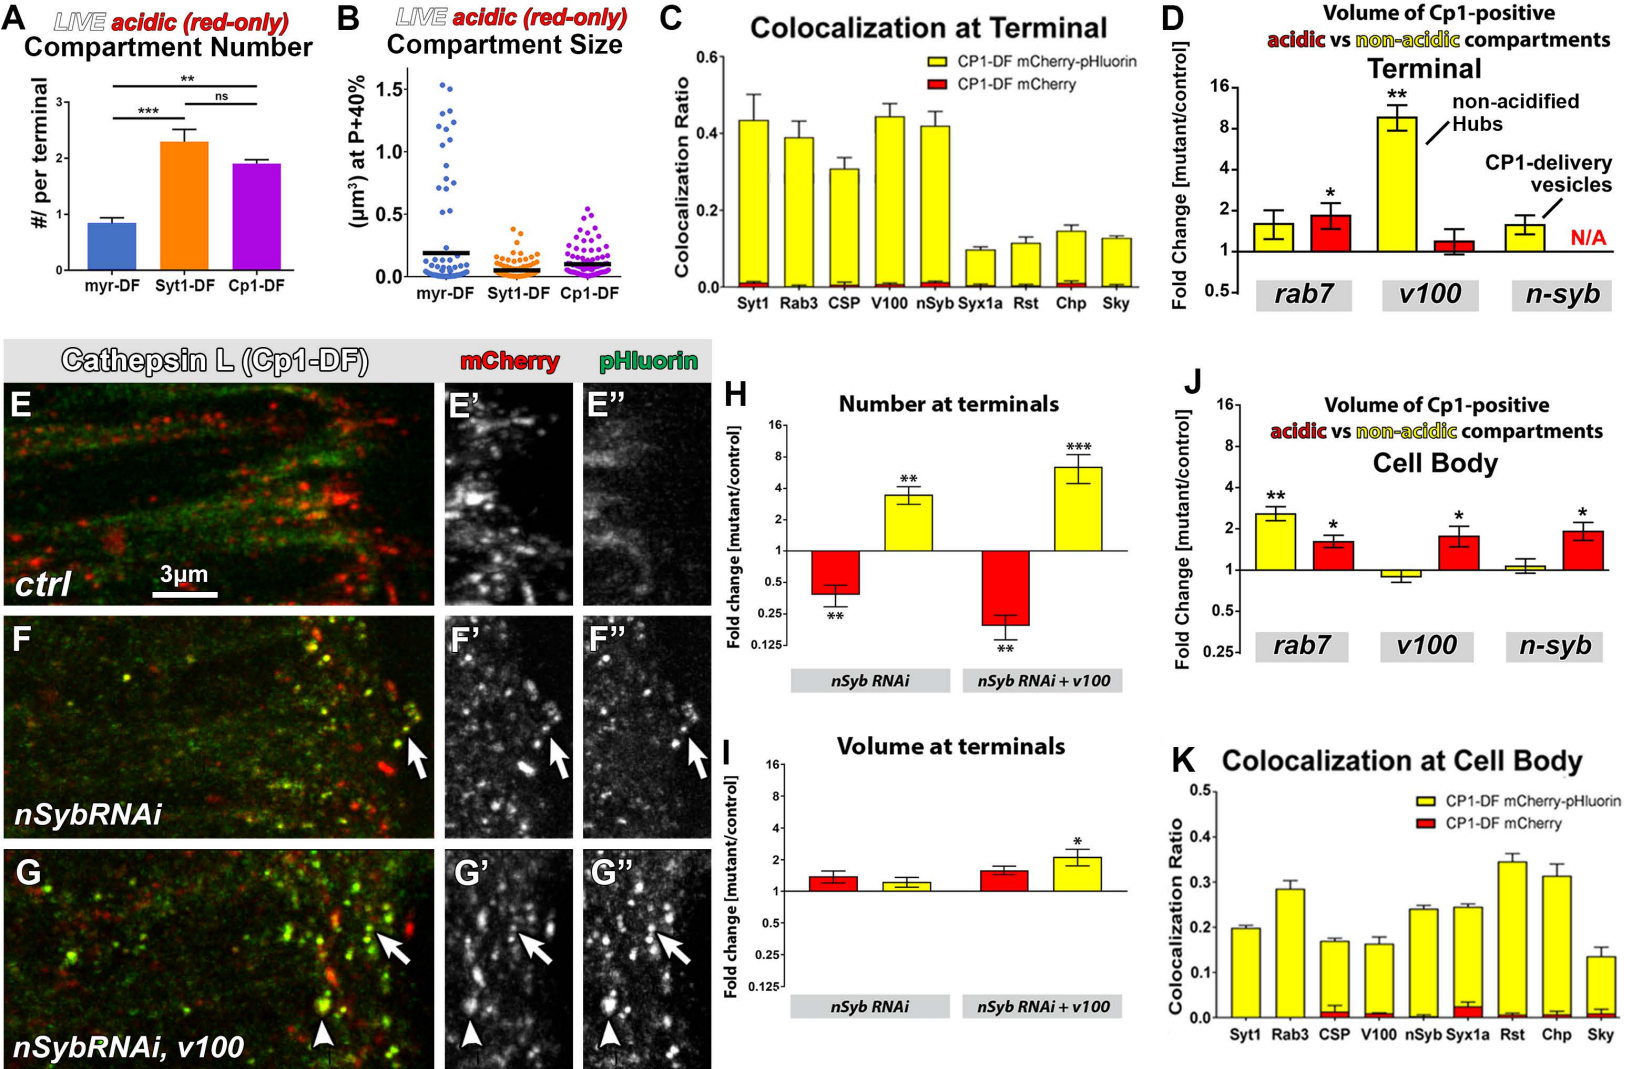

**Figure S7. Live and subcellular characterization of CP1-DF marked compartments at axon terminals and cell bodies. Related to Figure 6.**

(A and B) Mean number (A) and volume (B) of acidified CP1-DF compartments per axon terminal at P+40% compared to myr-DF and Syt1-DF.  $n=100$  per probe for volume analysis, black lines indicate mean values (B), mean  $\pm$  SEM (A),  $**p < 0.01$ ,  $***p < 0.001$ , Unpaired t-test, brain  $n=3$  per probe. (C) Wild-type colocalization of CP1-DF compartments with markers of SV proteins and plasma membrane proteins at axon terminals. Shown are ratios for 'yellow-fixed' and 'red-fixed' terminal compartments that colocalize with a given antibody divided by the total number of compartments. The 'yellow-fixed' and 'red-fixed' bars are stacked in the bar chart. Brain  $n=3$  per antibody staining. (D) Relative volumes of non-acidic (yellow) and acidic (red) compartments containing CP1-DF in rab7, v100 or nsyb mutant backgrounds at axon terminals. Mean  $\pm$  SEM,  $*p < 0.05$ ,  $**p < 0.01$ , Unpaired t-test, brain  $n=3$  per experimental condition. (E-G'') Live imaging of CP1-DF in n-Syb knockdown (n-Syb RNAi) or n-Syb knockdown in v100 mutant background at P+40% photoreceptor axon terminals. Arrows: small CP1-delivery vesicles. Arrowheads: large non-acidified hubs. (H and I) Relative number (H) and volume (I) of non-acidic (yellow) and acidic (red) compartments containing CP1-DF in n-Syb knockdown (n-Syb RNAi) or n-Syb knockdown in v100 mutant background at axon terminals. Mean  $\pm$  SEM,  $*p < 0.05$ ,  $**p < 0.01$ ,  $***p < 0.001$ , Unpaired t-test, brain  $n=3$  per experimental condition. (J) Relative volumes of non-acidic (yellow) and acidic (red) compartments containing CP1-DF in rab7, v100 or nsyb mutant backgrounds in cell bodies. Mean  $\pm$  SEM,  $*p < 0.05$ ,  $**p < 0.01$ , Unpaired t-test, brain  $n=3$  per experimental condition. (K) Wild-type colocalization of CP1-DF compartments with markers of SV proteins and plasma membrane proteins in cell bodies. Shown are ratios for 'yellow-fixed' and 'red-fixed' compartments that colocalize with a given antibody divided by the total number of compartments. The 'yellow-fixed' and 'red-fixed' bars are stacked in the bar chart. Brain  $n=3$  per antibody staining.

| Probe, Genotype                    | Fusion                |      |             | Fission               |      |             | Speed                 |      |              | Max. displacement<br>(up to 15 min tracks) |      |           |
|------------------------------------|-----------------------|------|-------------|-----------------------|------|-------------|-----------------------|------|--------------|--------------------------------------------|------|-----------|
|                                    | Mean<br>[ $\mu$ /min] | SEM  | Range       | Mean<br>[ $\mu$ /min] | SEM  | Range       | Mean<br>[ $\mu$ /min] | SEM  | Range        | Mean<br>[ $\mu$ /min]                      | SEM  | Range     |
| <b>myr-DF, Control</b>             | 1.93                  | 0.21 | 0.77 - 3.11 | 2.02                  | 0.24 | 0.44 - 3.16 | 5.99                  | 0.51 | 3.39 - 10.3  | 2.33                                       | 0.22 | 1.3 - 3.7 |
| <b>myr-DF, <i>rab7 mutant</i></b>  |                       | --   |             |                       | --   |             | 5.88                  | 0.67 | 2.73 - 12.4  | 1.99                                       | 0.26 | 0.9 - 3.6 |
| <b>myr-DF, <i>v100 mutant</i></b>  | 1.93                  | 0.23 | 1.04 - 3.36 | 2.58                  | 0.21 | 1.19 - 3.82 | 5.20                  | 0.47 | 2.37 - 8.60  | 2.43                                       | 0.34 | 0.7 - 5.2 |
| <b>myr-DF, <i>nsyb mutant</i></b>  | 1.92                  | 0.24 | 0.92 - 3.39 | 2.59                  | 0.27 | 1.42 - 4.88 | 5.75                  | 0.42 | 5.03 - 9.54  | 2.67                                       | 0.47 | 0.9 - 5.9 |
| <b>Syt1-DF, Control</b>            | 2.21                  | 0.27 | 1.35 - 5.00 | 2.47                  | 0.20 | 1.50 - 3.69 | 6.00                  | 0.32 | 4.48 - 8.47  | 2.74                                       | 0.26 | 1.2 - 4.1 |
| <b>Syt1-DF, <i>rab7 mutant</i></b> | 1.36                  | 0.17 | 0 - 1.98    | 1.66                  | 0.15 | 0.55 - 2.44 | 5.57                  | 0.49 | 3.16 - 10.50 | 2.33                                       | 0.15 | 1.4 - 3.1 |
| <b>Syt1-DF, <i>v100 mutant</i></b> | 1.62                  | 0.27 | 0.44 - 3.57 | 2.04                  | 0.30 | 0 - 3.57    | 5.03                  | 0.42 | 2.70 - 7.77  | 1.96                                       | 0.33 | 0.7 - 4.1 |
| <b>Syt1-DF, <i>nsyb mutant</i></b> | 1.83                  | 0.17 | 0.55 - 2.65 | 2.28                  | 0.29 | 0.73 - 3.97 | 6.33                  | 0.46 | 4.14 - 9.34  | 2.99                                       | 0.50 | 0.5 - 6.2 |
| <b>ATG8-mCherry-GFP</b>            | 0.51                  | 0.13 | 0 - 1.71    | 0.79                  | 0.11 | 0 - 1.90    | 5.53                  | 0.45 | 3.01 - 8.05  | 1.99                                       | 0.36 | 0.1 - 5.2 |

**Table S1. Quantitative features of hub compartment dynamics. Related to Figure 3.**
